# Supplementary material
Source: PubMed Central journal article supplement (PMC6516744)

# DMS

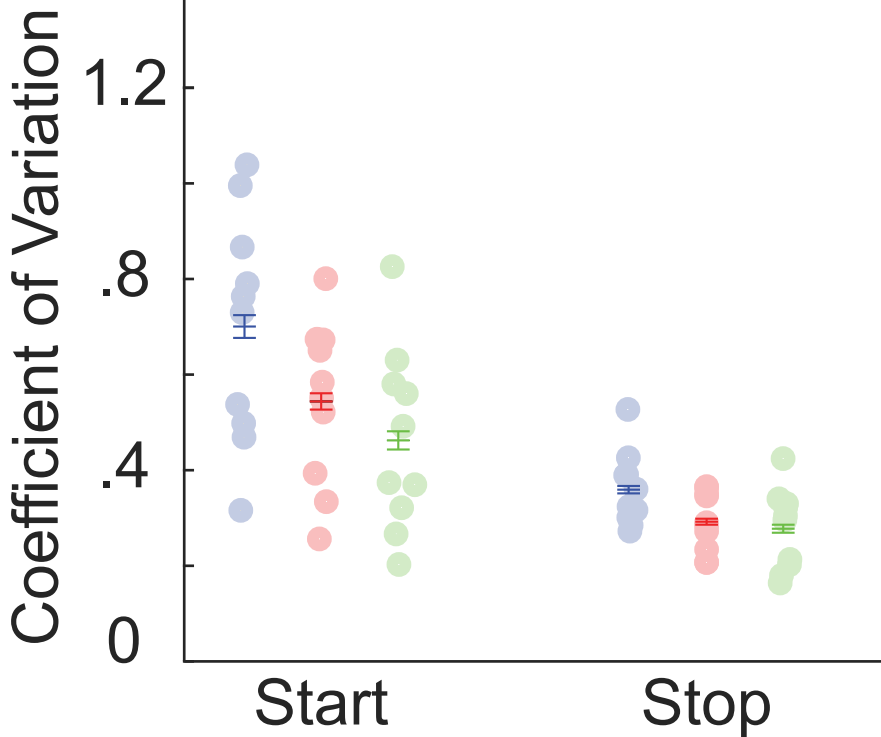

# DLS

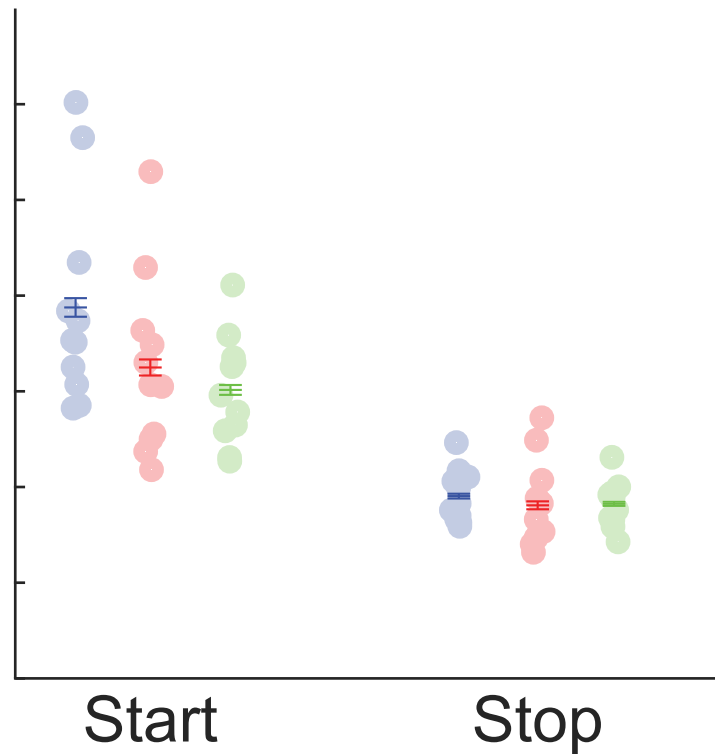

Supplement: NIHMS1508008-supplement-1.pdf [file NIHMS1508008-supplement-1.pdf]
